# Supplementary material for: An Evaluation of the Early Alert Program at Columbia College.
Source: Royal Society of Chemistry journal article supplement (doi:10.1039/d3fo03331g), 2002-05-01
Supplement: d3fo03331g4.pdf [file d3fo03331g4.pdf]

## 1 **Supplementary information**

2     **Encapsulation efficiency (EE).** One milliliter of astaxanthin nanoparticles were  
3 mixed with 1.0 mL of anhydrous ethanol, centrifuged at 10000 ×g for 10 min, and the  
4 supernatant was collected. The operation was repeated until the supernatant was  
5 colorless. The astaxanthin of the supernatant was regarded as the content of free  
6 astaxanthin, which was measured using a UV-visible spectrophotometer (SP-754,  
7 Shanghai Spectrum, Shanghai) at 476 nm. The EE was calculated according to  
8 equation (1).

$$9 \quad EE (\%) = (1 - \text{content of free astaxanthin}/\text{total amount of astaxanthin}) \times 100$$

10

(1)

11     The size and zeta potential of the particles with the highest EE were determined at  
12 25 °C using a nanoparticle size and zeta potential analyzer (Malvern Zetasizer Nano  
13 ZSE, Malvern Panalytical, UK).

14     **X-ray diffraction (XRD).** The crystalline structures of astaxanthin, MFGM-GA,  
15 and astaxanthin nanoparticles were determined using an X-ray diffractometer (XRD,  
16 D-MAX 2500, Rigaku, Japan). We used Cu Ka radiation at 40 kV and 30 mA, and  
17 scans were made between 5 and 55 degrees at a scanning rate of 10 degrees/min.

18     **Thermal analysis.** The thermal weight loss behaviors of astaxanthin, carrier, and  
19 astaxanthin nanoparticles were determined using a Pyris 1 TGA thermogravimetric  
20 analyzer (TGA, PerkinElmer, Inc., UC). Appropriate amounts (about 3 mg) of  
21 samples were taken flatly into an aluminum tray and heated from 30 °C to 500 °C at a  
22 heating rate of 10 °C/min under a nitrogen flow of 100 mL/min.

23 **Gastrointestinal stability.** To study the digestive behavior of astaxanthin  
24 nanoparticles, a model of gastrointestinal digestion of astaxanthin was built. The  
25 astaxanthin nanoparticles and the aqueous solution containing a comparable amount  
26 of free astaxanthin (0.5 mL) were mixed with an equal amount of ultrapure water.  
27 Then, 1 mL of simulated gastric fluid (pH 7.0) was added. It was shaken for 1 h at  
28 100 rpm in a water bath at 37 °C in the dark. Sampling and analysis were performed  
29 at 30 and 60 min. Subsequently, 2 mL of simulated intestinal fluid (pH 7.0) was added  
30 and shaken in a water bath (100 rpm) for 2 h at 37 °C in the dark. The digested  
31 samples were centrifuged at  $10000 \times g$  for 15 min, and the supernatant was collected  
32 to determine the bioaccessibility of astaxanthin. The digestibility of astaxanthin was  
33 calculated according to the equation (2).

34 
$$\text{Digestibility of astaxanthin (\%)} = A_s/A_0 \times 100 \quad (2)$$

35 Where:  $A_0$  denoted absorbance of the supernatant at 476 nm without digestion;  $A_s$   
36 denoted absorbance of supernatant at 476 nm after digestion.

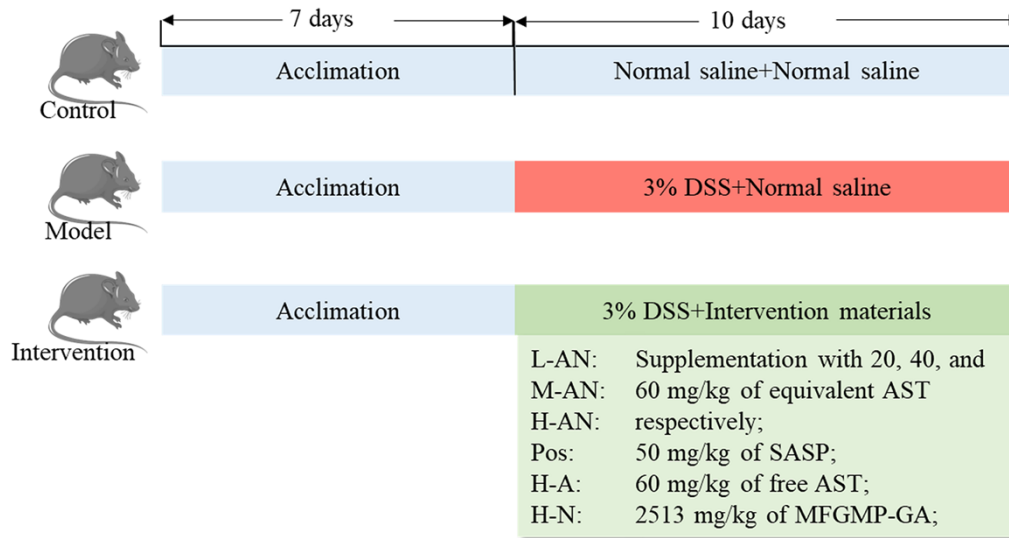

38

39 **Figure S1.** Schematic diagram of the animal experiment.

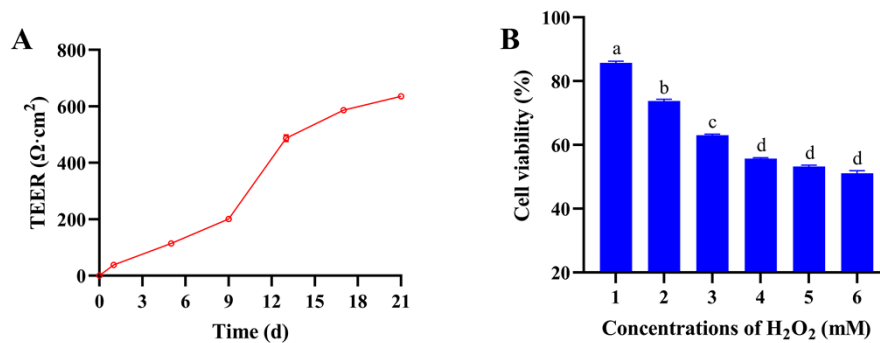

41

42 **Figure S2.** Effect of astaxanthin nanoparticles on Caco-2 cells. (A) Relationship  
43 between TEER of Caco-2 monolayers and incubation time; (B) Effect of H<sub>2</sub>O<sub>2</sub> on cell  
44 viability. Different lowercase letters (a, b, c, and d) represent statistically significant  
45 differences at the level of  $p < 0.05$ .

46

47 Table S1 DAI scoring criteria of mice

| Score | Weight loss (%) | Stool character       | Fecal occult blood  |
|-------|-----------------|-----------------------|---------------------|
| 0     | 0               | Normal                | Normal              |
| 1     | 1-5             | Soft but still formed | Weak positive blood |
| 2     | 6-10            | Soft stool            | Positive blood      |
| 3     | 11-15           | Loose stools          | Visible bleeding    |
| 4     | >15             | Watery stool          | gross bleeding      |

48 The DAI was recorded as the equation:

$$49 \quad \quad \quad DAI \quad \quad \quad = (body\ weight\ score + stool\ consistency\ score + rectal$$

50

51 Table S2 The pathology scoring criteria of colon

| Score | Intestinal epithelium        | Inflammation severity                                  |
|-------|------------------------------|--------------------------------------------------------|
| 0     | Normal                       | None                                                   |
| 1     | Goblet cells damage          | Infiltration limited to the crypt                      |
| 2     | Extensive goblet cell damage | Infiltrate present in muscular mucosa                  |
| 3     | Loss of goblet cells         | Covering large areas of muscular mucosa, mucosal edema |
| 4     | Large areas without crypts   | Infiltration in submucosa                              |

54 Table S3 The ratio of alkaline phosphatase activity on AP to BL

| Time (d) | Activity (AP) | Activity (BL) | AP/BL             |
|----------|---------------|---------------|-------------------|
| 5        | 4.93±0.12     | 5.12±0.07     | 0.96 <sup>d</sup> |
| 10       | 6.22±0.23     | 5.22±0.13     | 1.19 <sup>c</sup> |
| 15       | 14.46±0.31    | 8.96±0.44     | 1.61 <sup>b</sup> |
| 20       | 18.87±0.12    | 10.01±0.02    | 1.89 <sup>a</sup> |

55 <sup>a-d</sup> Different letters in each column indicate significant differences ( $p < 0.05$ ).

56

57 Table S4 The visceral index of mice in each group

|      | Cardiac<br>Index (%)   | Liver index<br>(%)      | Kidney<br>index (%)     | Spleen index<br>(%)     | Thymus<br>index (%)    |
|------|------------------------|-------------------------|-------------------------|-------------------------|------------------------|
| Con  | 0.56±0.01 <sup>a</sup> | 4.14±0.12 <sup>a</sup>  | 1.11±0.11 <sup>b</sup>  | 0.26±0.08 <sup>b</sup>  | 0.16±0.01 <sup>a</sup> |
| Mod  | 0.51±0.03 <sup>a</sup> | 3.66±0.14 <sup>bc</sup> | 1.32±0.09 <sup>a</sup>  | 0.36±0.11 <sup>a</sup>  | 0.18±0.01 <sup>a</sup> |
| L-AN | 0.52±0.12 <sup>a</sup> | 3.77±0.15 <sup>b</sup>  | 1.02±0.01 <sup>b</sup>  | 0.28±0.01 <sup>ab</sup> | 0.16±0.02 <sup>a</sup> |
| M-AN | 0.50±0.06 <sup>a</sup> | 3.96±0.08 <sup>ab</sup> | 1.05±0.03 <sup>b</sup>  | 0.29±0.03 <sup>ab</sup> | 0.16±0.01 <sup>a</sup> |
| H-AN | 0.51±0.11 <sup>a</sup> | 4.04±0.34 <sup>a</sup>  | 1.09±0.09 <sup>b</sup>  | 0.25±0.01 <sup>b</sup>  | 0.16±0.03 <sup>a</sup> |
| Pos  | 0.44±0.05 <sup>b</sup> | 3.56±0.21 <sup>c</sup>  | 1.15±0.11 <sup>b</sup>  | 0.18±0.02 <sup>c</sup>  | 0.17±0.05 <sup>a</sup> |
| H-A  | 0.52±0.13 <sup>a</sup> | 3.76±0.18 <sup>b</sup>  | 1.20±0.08 <sup>ab</sup> | 0.22±0.07 <sup>c</sup>  | 0.16±0.04 <sup>a</sup> |
| H-N  | 0.53±0.11 <sup>a</sup> | 3.81±0.15 <sup>b</sup>  | 1.24±0.06 <sup>ab</sup> | 0.20±0.06 <sup>c</sup>  | 0.16±0.03 <sup>a</sup> |

58 <sup>a-c</sup> Different letters in each column indicate significant differences ( $p < 0.05$ ).
